# Supplementary material for: Trophic interactions with heterotrophic bacteria limit the range of Prochlorococcus
Source: PubMed Central journal article supplement — Proc Natl Acad Sci U S A. 2022 Jan 4;119(2):e2110993118. doi: 10.1073/pnas.2110993118 (PMC8764666; doi:10.1073/pnas.2110993118), 2022-01-04
Supplement: pnas.2110993118.sapp.pdf [file pnas.2110993118.sapp.pdf]

1

## 2 **Supplementary Information for**

### 3 **Trophic Interactions with Heterotrophic Bacteria Limit the Range of *Prochlorococcus***

4 **C. L. Follett, S. Dutkiewicz, F. Ribalet, E. Zakem, D. Caron, E. V. Armbrust, and M. J. Follows**

5 **Correspondence Should be Adressed to**  
6 **Christopher L. Follett**  
7 **E-mail: follett@mit.edu**

#### 8 **This PDF file includes:**

- 9     Supplementary text
- 10    Figs. S1 to S7
- 11    Table S1
- 12    SI References

## 13 Supporting Information Text

### 14 S1. Collapse Explained in Terms of a Continuous Size Spectrum

15 Instead of focusing on discrete size classes and completing the nutrient flow as in Main Text Fig. 2A, we can approximate the  
16 time evolution of the continuous size distribution of a plankton class directly. We write the biomass distribution,  $\rho_i(r)$ , where  $r$   
17 is the organism's size and  $i$  its type (like phytoplankton) as

$$18 \quad \frac{d\rho_i(r)}{dt} = \mu_i \rho_i - m \rho_i^2 \quad [s1]$$

19 where  $\mu_i(r)$  is the growth rate and  $m$  the death rate. To simplify the mathematics, we have approximated the effect of  
20 zooplankton predation as the nonlinear death rate term,  $-m\rho_i^2$ .  $\mu$  is expressed as a Michaelis-Menten equation in terms of the  
21 limiting resource,  $R$ , maximum growth rate,  $\mu_{max}$ , and size scaling exponents ( $\alpha$  and  $\beta$ )

$$22 \quad \mu_i \approx \frac{\mu_i^{max} \tilde{R}_i r^\alpha}{r^\beta + \tilde{R}_i}. \quad [s2]$$

23 The half-saturation constant  $\kappa_i$  is eliminated by defining  $\tilde{R}_i = \frac{R_i}{\kappa_i}$ . Combining this equation with the steady state solution for  
24  $\rho_i = \frac{\mu_i}{m}$  from Eq s1 provides a simple prediction for the size distribution. As the resource supply (concentration in steady state)  
25 increases, the relative abundance of larger size classes increases relative to smaller size classes, but the absolute concentration  
26 of the smaller size classes always increases since  $\frac{\partial \rho}{\partial R} > 0$ . As the concentration of a size class increases, its grazing rate constant  
27 also increases providing an opportunity for the grow-in of larger and larger size classes of phototrophs. Similar to the main  
28 text, these equations do not allow for the elimination of a phytoplankton size class.

29 We can explain the crash of *Prochlorococcus* populations poleward by considering the size spectrum of heterotrophic bacteria  
30 along with autotrophs. Eq s1 is sufficient for this case, with the addition that we assume zooplankton feed depending on size so  
31 that

$$32 \quad \frac{d\rho_i(r)}{dt} = \mu_i \rho_i - m \left( \sum \rho_i \right) \rho_i. \quad [s3]$$

33 The summation term represents the fact that the zooplankton population in steady state is proportional to the sum of all  
34 plankton types ( $i$ ) in the size class that they consume. If we allow there to be two plankton types ( $h$  for heterotrophic bacteria  
35 and  $p$  for phytoplankton), we can solve for the organism size,  $r_c$ , where phytoplankton outcompete heterotrophic bacteria. We  
36 do this by setting  $\mu_h = \mu_p$  in steady state and find

$$37 \quad r_c = \left( \frac{\frac{\mu_h^{max}}{R_h} - \frac{\mu_p^{max}}{R_p}}{\frac{\mu_p^{max}}{R_h} - \frac{\mu_h^{max}}{R_p}} \right)^{\frac{1}{\beta}}. \quad [s4]$$

38 The  $\alpha$  scaling drops out of the equation, and using (1) we can simplify further by noting that  $\beta \approx 1$ . This equation suggests  
39 that the size transition to autotrophy increases with increasing organic nutrient supply. At a critical production rate, we expect  
40 the smallest autotrophs, in this case *Prochlorococcus* to be replaced by heterotrophic bacteria.

41 Since the organic material,  $R_h$ , heterotrophic bacteria feed upon comes from primary production, we can formalize this idea  
42 by assuming that a constant fraction of primary production,  $f$ , becomes heterotrophic growth. Under this condition

$$43 \quad \int_0^{r_c} \mu_h^2 = f \int_{r_c}^{\infty} \mu_p^2 \quad [s5]$$

44 and the concentrations match at the critical size,  $r_c$ . Since the sensitivity of the growth rate relative to nutrients increases  
45 monotonically with size, increasing  $R_p$  always leads to an increase in  $r_c$ :  $\frac{dr_c}{dR_p} > 0$ . Thus, under the assumptions used to  
46 generate the theory, at a critical resource supply,  $r_c$  becomes large enough to exclude *Prochlorococcus*.

### 47 S2. Zero-Dimensional Model

48 In the experiments in Main Text Fig. 3B,D for simplicity in illustration, we used only an external supply rate ( $S_{R_p}$ ). That is,  
49 the remineralization component was assumed to implicitly be part of the rate provided. In one of the additional experiments  
50 (Supplemental Fig. S1C), we instead assume a closed system such that  $S_{R_p}$  is only the remineralization of organic matter.  
51 Here the different final solutions shown are instead set by the initial total nitrogen (sum of living, detrital and inorganic) in the  
52 system. The results are qualitatively similar. In another final experiment (Fig. S1D), we allow the half-saturation constants  $k_p$   
53 and  $k_h$  to have different exponents (in this case  $k_h$  exponent is double that of  $k_p$ ). Again, though quantitatively different, the  
54 results remain qualitatively the same.

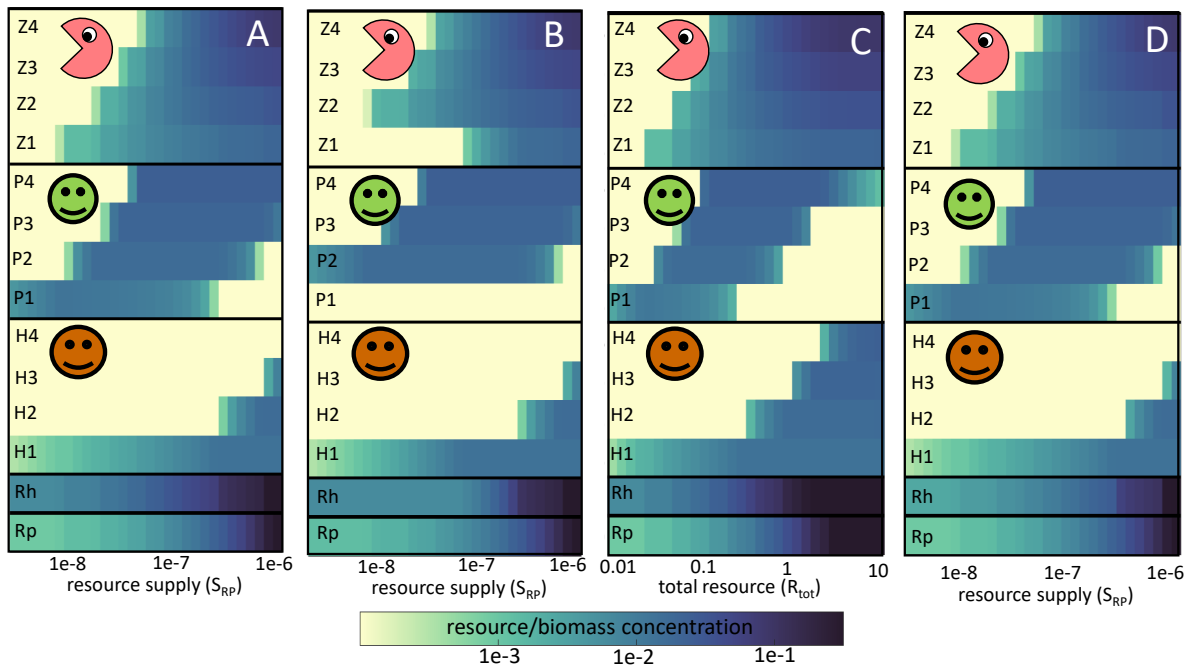

**Fig. S1.** Solutions for zero-D numerical model with parameter and ecosystem modifications: (A) for original experiment (same plot as in Fig. 3D), (B) same as A but initialized without the smallest phytoplankton size class, (C) solutions found for different total resource rather than for external resource supply; in this example  $S_{Rp}$  is just the remineralization component  $(1 - \delta) \sum \mu_{h,j} H_j$ , (D) same as (A) but with exponent of half-saturation constant double that given in Supplemental Table S1. Solutions are steady state for low resource supply rates/total resource, and averages over several cycles of predator-prey oscillations that occur for higher resource supply rates/total resource.

### 55 S3. Global Biophysical Model

56 The model we use is based on a previous model (2). Here we outline the differences to that model. We reduce the number of  
57 phytoplankton from 35 types to 31 types, removing some of the larger size classes that did not survive in the earlier studies.  
58 Missing traits such as buoyancy regulation, shape, spines, or chain formation might have allowed these larger sizes to exist, but  
59 such additional components of model development are beyond the scope of this study. We added three heterotrophic bacteria  
60 and thus an explicit remineralization loop rather than the rate based parameterization as in our earlier models. We also added  
61 a smaller zooplankton class as a grazer for the smallest heterotrophic bacteria. Most parameters are as used in our previous  
62 size-based models (2–5). However, given a newer laboratory synthesis paper (6), we use different coefficients for the functional  
63 group maximum growth rates (see Table S1), as well as differences in group temperature functions.

### 64 References

- 65 1. E Litchman, CA Klausmeier, OM Schofield, PG Falkowski, The role of functional traits and trade-offs in structuring  
66 phytoplankton communities: Scaling from cellular to ecosystem level. *Ecol. Lett.* **10**, 1170–1181 (2007).
- 67 2. S Dutkiewicz, PW Boyd, U Riebesell, Exploring biogeochemical and ecological redundancy in phytoplankton communities  
68 in the global ocean. *Glob. Chang. Biol.* **27**, 1196–1213 (2021).
- 69 3. S Dutkiewicz, et al., Dimensions of marine phytoplankton diversity. *Biogeosciences* **17**, 609–634 (2020).
- 70 4. M Sonnewald, S Dutkiewicz, C Hill, G Forget, Elucidating ecological complexity: Unsupervised learning determines global  
71 marine eco-provinces. *Sci. Adv.* **6**, eaay4740 (2020).
- 72 5. AM Kuhn, K Fennel, Evaluating ecosystem model complexity for the northwest North Atlantic through surrogate-based  
73 optimization. *Ocean. Model.* **142**, 101437 (2019).
- 74 6. S Anderson, A Barton, S Clayton, S Dutkiewicz, T Rynearson, Marine phytoplankton functional types exhibit diverse  
75 responses to thermal change. *Nat. Commun.* **12**, 6413 (2021).
- 76 7. MJ Follows, S Dutkiewicz, B Ward, C Follett, Theoretical interpretations of subtropical plankton biogeography in *Microbial*  
77 *Ecology of the Oceans*, ed. DK Gasol, Josep. (John Wiley & Sons, Ltd, Hoboken, NJ), 3rd edition, p. 467 (2018).
- 78 8. BA Ward, Temperature-correlated changes in phytoplankton community structure are restricted to polar waters. *PLoS*  
79 *ONE* **10** (2015).
- 80 9. ET Buitenhuis, et al., MAREDAT: Towards a world atlas of MARine Ecosystem DATA. *Earth Syst. Sci. Data* **5**, 227–239  
81 (2013).
- 82 10. ET Buitenhuis, et al., Picophytoplankton biomass distribution in the global ocean. *Earth Syst. Sci. Data* **4**, 37–46 (2012).
- 83 11. CJ O'Brien, et al., Global marine plankton functional type biomass distributions: Coccolithophores. *Earth Syst. Sci. Data*  
84 **5**, 259–276 (2013).
- 85 12. YW Luo, et al., Database of diazotrophs in global ocean: Abundance, biomass and nitrogen fixation rates. *Earth Syst.*  
86 *Sci. Data* **4**, 47–73 (2012).
- 87 13. K Leblanc, et al., A global diatom database- Abundance, biovolume and biomass in the world ocean. *Earth Syst. Sci.*  
88 *Data* **4**, 149–165 (2012).

| parameter                                                      |                  | a      | b     | units                      |
|----------------------------------------------------------------|------------------|--------|-------|----------------------------|
| phytoplankton<br>maximum growth rate<br>$\mu_p^{max}$          | <b>0-D model</b> |        |       | 1/day                      |
|                                                                | <3 $\mu$ m       | 1.1063 | 0.28  |                            |
|                                                                | >3 $\mu$ m       | 2.5383 | -0.10 |                            |
|                                                                | <b>3-D model</b> |        |       |                            |
|                                                                | pico-cyan        | 1.1063 | 0.28  |                            |
|                                                                | pico-euk         | 1.2066 | 0.28  |                            |
|                                                                | cocco            | 1.9454 | 0.08  |                            |
| diato                                                          | 0.8083           | -0.10  |       |                            |
| diatom                                                         | 2.5383           | -0.10  |       |                            |
| dino                                                           | 1.3355           | -0.10  |       |                            |
| heterotrophic bacteria<br>maximum growth rate<br>$\mu_h^{max}$ |                  | 1.836  | 0.28  | 1/day                      |
| nutrient uptake half<br>saturation constant,<br>$k$            | NO <sub>3</sub>  | 0.17   | 0.27  | mmol N/m <sup>3</sup>      |
| minimum cell quota,<br>$Q^{min}$                               | N                | 0.07   | -0.17 | mmol N/<br>mmol C          |
| maximum nutrient<br>uptake rate, $V^{max}$                     | NO <sub>3</sub>  | 0.51   | -0.27 |                            |
| sinking                                                        | <b>0-D model</b> |        |       | m/day                      |
|                                                                | plankton         | 0      |       |                            |
|                                                                | <b>3-D model</b> |        |       |                            |
|                                                                | phytoplankton    | 0.28   | 0.39  |                            |
| het bacteria                                                   | 0.28             | 0.39   |       |                            |
| zooplankton                                                    | 0                |        |       |                            |
| maximum per capita grazing<br>$g$                              | <b>0-D model</b> |        |       | m <sup>3</sup> /mmol N/day |
|                                                                | zooplankton      | 3.63   | -0.16 |                            |
| maximum grazing rate<br>$g^{max}$                              | <b>3-D model</b> |        |       | 1/day                      |
|                                                                | mixotrophs       | 12.7   | -0.16 |                            |
| zooplankton                                                    | 15.9             | -0.16  |       |                            |

**Table S1. Allometric parameters used in the two sets of numerical experiments. Parameters values are given  $aV^b$  where  $V$  is cell volume. Half-saturation constant for growth  $\kappa$  used in the equations in the Monod form are given by the function  $\kappa = k \frac{\mu^{max} Q^{min}}{V^{max}}$  following (3, 7).**

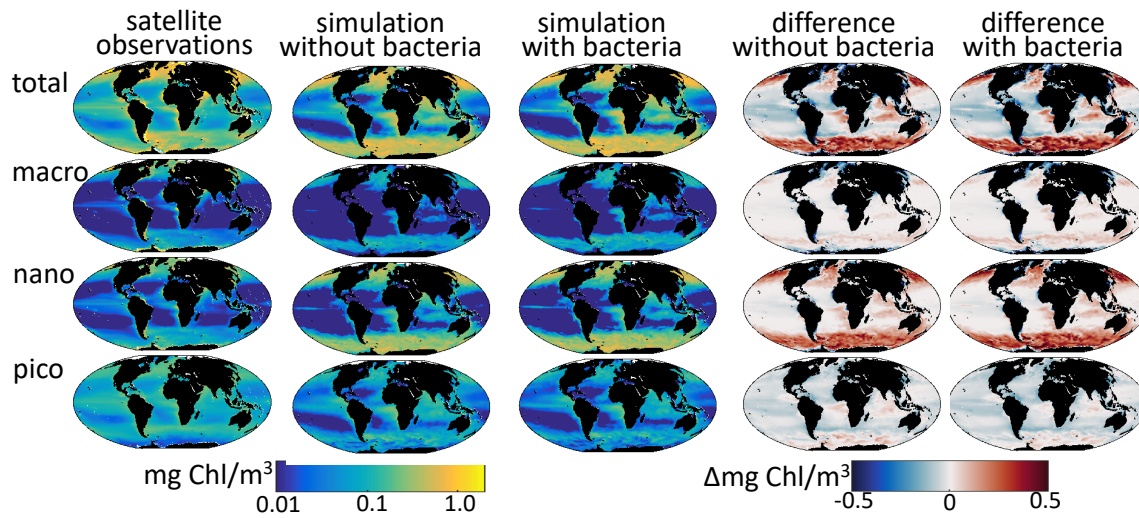

**Fig. S2.** Annual mean surface Chl ( $\text{mg}/\text{m}^3$ ) from (left column) Satellite observations (NASA MODIS), and three-dimensional global biophysical model simulations (second column) without explicit grazing, and (third column) with explicit grazing. Left two columns show the difference between the simulations and the satellite observations (positive values indicate model over-estimates). Top row is for total Chl-a, while the lower rows the Chl-a is split into size classes based on equivalent spherical diameter (ESD): macro ( $>20\mu\text{m}$ ), nano ( $2\text{-}20\mu\text{m}$ ) and pico ( $<2\mu\text{m}$ ). For the observations the size divisions from a satellite product determined from total Chl-a concentrations (8).

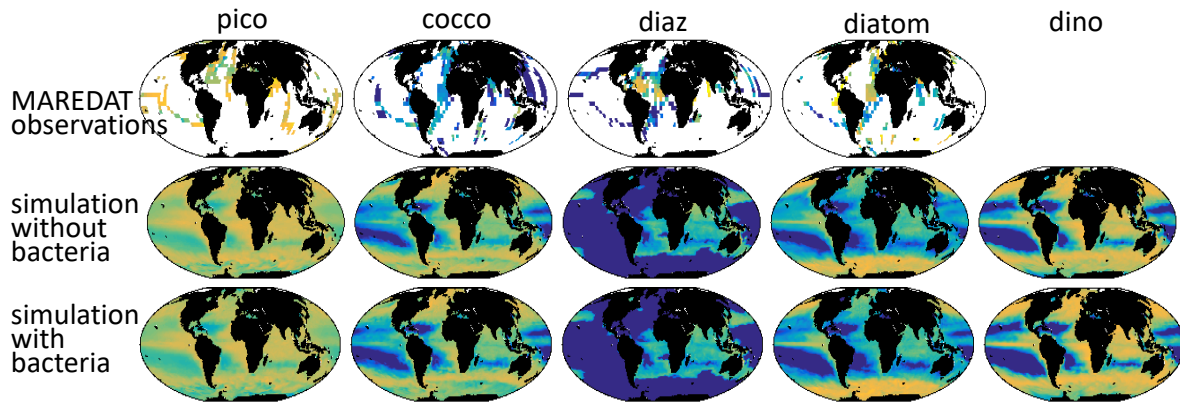

**Fig. S3.** Surface phytoplankton group biomass ( $\text{g C/m}^3$ ) from (top row) compilation of shipboard in situ data (MAREDAT (9)), and three-dimensional global biophysical model simulations annual mean (second two) without explicit grazing, and (third row) with explicit grazing. Columns are arranged as functional groups from pico-phytoplankton ( $\text{ESD} < 2 \mu\text{m}$  (10)), coccolithophores (11), nitrogen fixing diazotrophs (12), diatoms (13), and mixotrophic dinoflagellates. Note that MAREDAT did not collect dinoflagellate data.

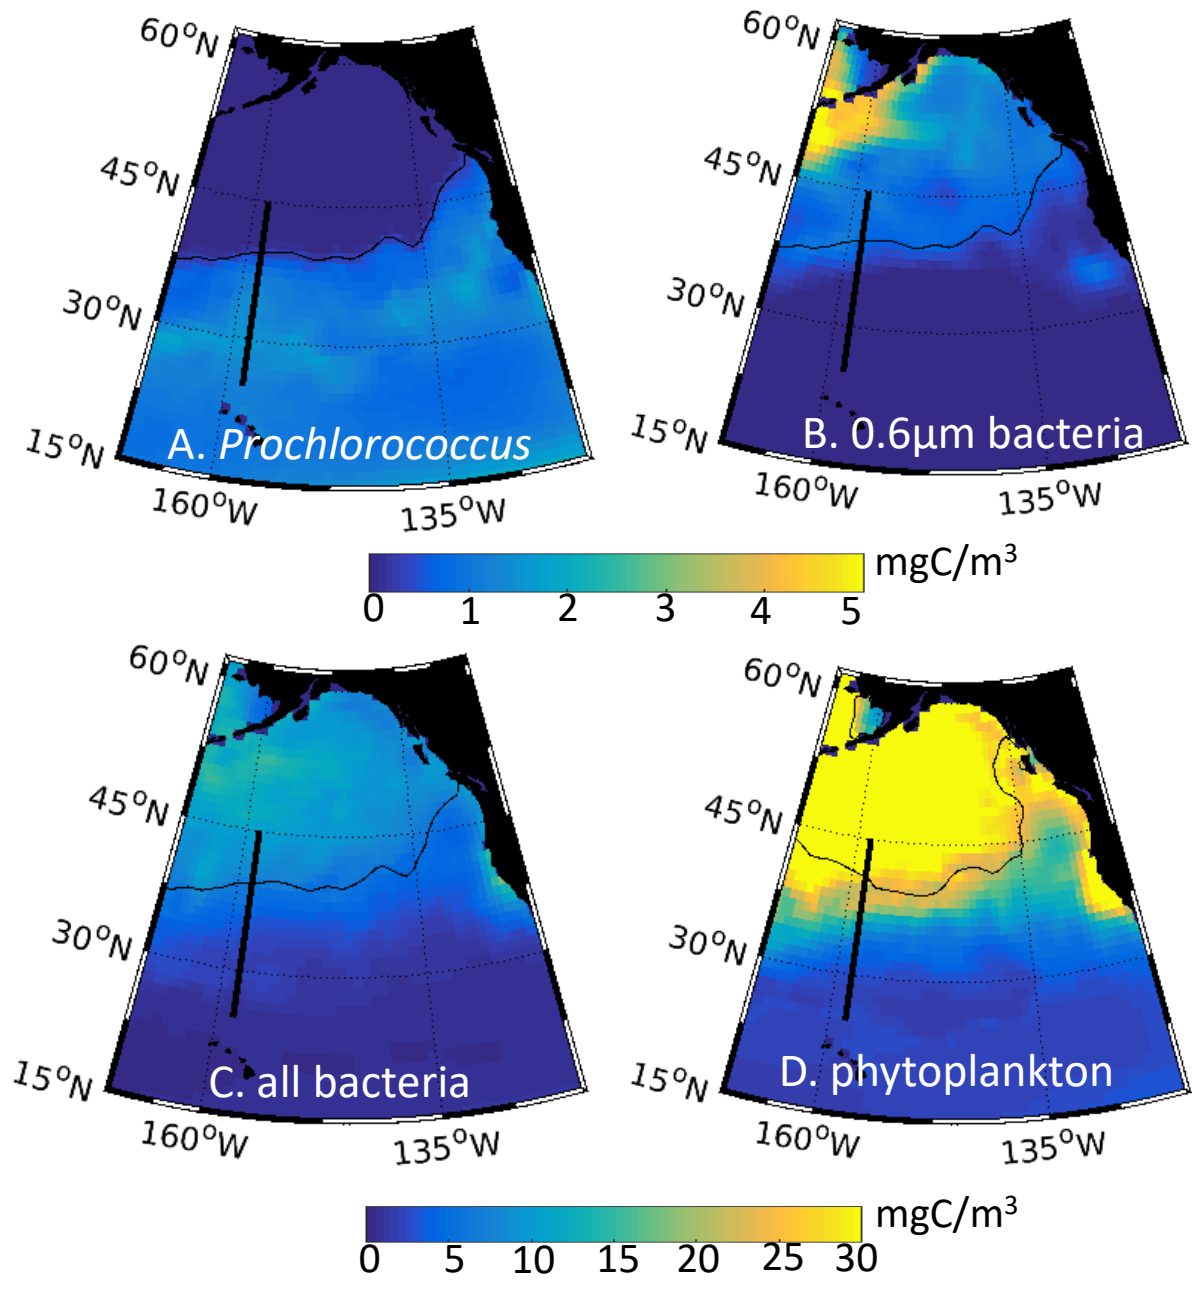

**Fig. S4.** Annual mean model surface biomass ( $\text{mg C/m}^3$ ) for analogs of (A) *Prochlorococcus*, (B) second size class ( $0.6 \mu\text{m}$  ESD) heterotrophic bacteria, (C) total heterotrophic bacteria, (D) total phytoplankton. Black line indicates the collapse of the *Prochlorococcus*-anlaogs. Note that colorbar for top and bottom panels is different.



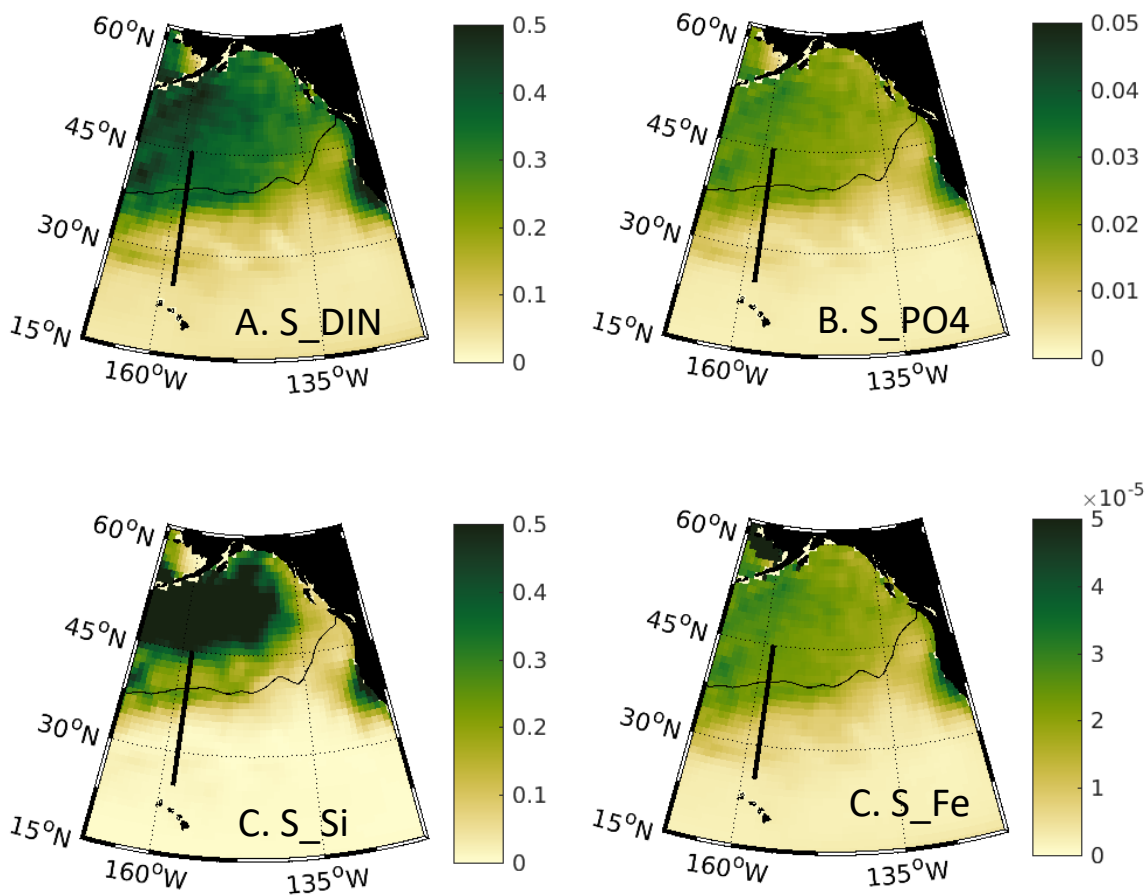

**Fig. S5.** Annual mean rate of supply of nutrients into the top 50m of the model ocean: (A) dissolved inorganic nitrogen ( $\text{mmol N/m}^3/\text{y}$ ), (B) phosphate ( $\text{mmol P/m}^3/\text{y}$ ), (C) silicic acid ( $\text{mmol Si/m}^3/\text{y}$ ), (D) dissolved inorganic iron ( $\text{mmol Fe/m}^3/\text{y}$ ). Black line indicates the collapse of the *Prochlorococcus*-anlaogs. Supply rate include all physical transport of the nutrient, remineralization, and in the case of iron, also aeolian dust.

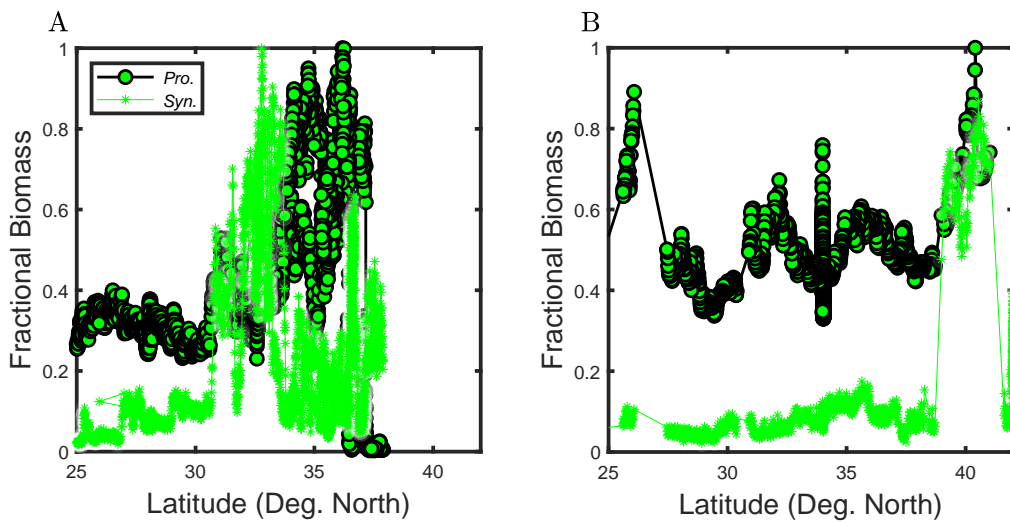

**Fig. S6.** Trends in *Prochlorococcus* and *Synechococcus* Biomass: The fractional biomass (relative to maximum value of each species along transect) of these two phytoplankton for (A) a transect in the North Pacific in April 2016 and (B) similar transect from September 2017. Cruises are the same as in Fig. 5.

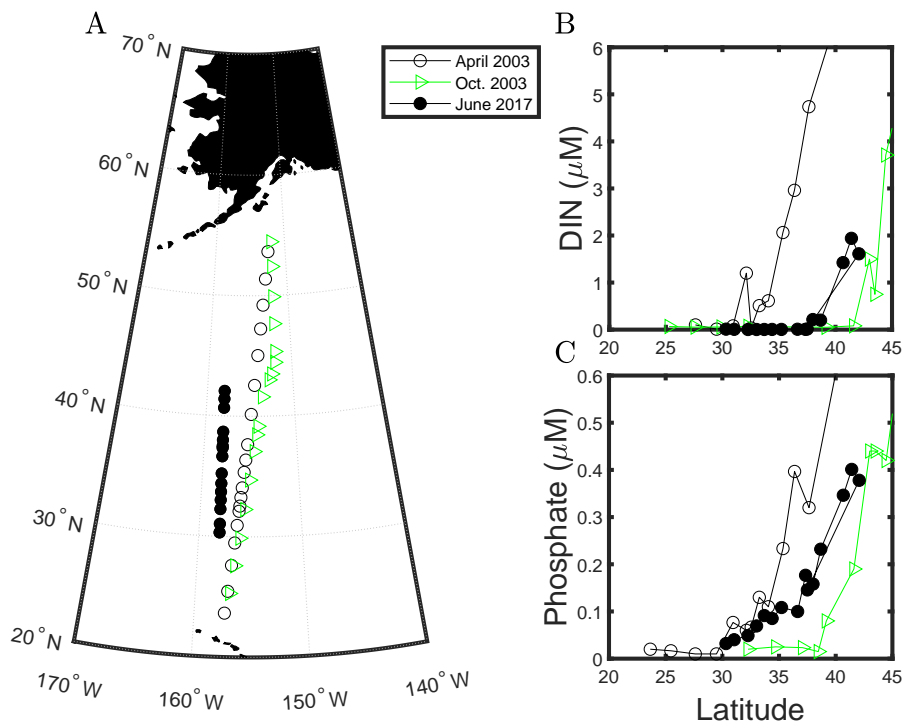

**Fig. S7.** Latitudinal trends in dissolved inorganic nitrogen (DIN) and phosphate for three of the cruises shown in the main text. Data for the September 2017 cruise are not available.
